# Supplementary material for: Breeding Tomato Hybrids for Flavour: Comparison of GWAS Results Obtained on Lines and F1 Hybrids
Source: MDPI journal article supplement (doi:10.3390/genes12091443), 2021-09-18

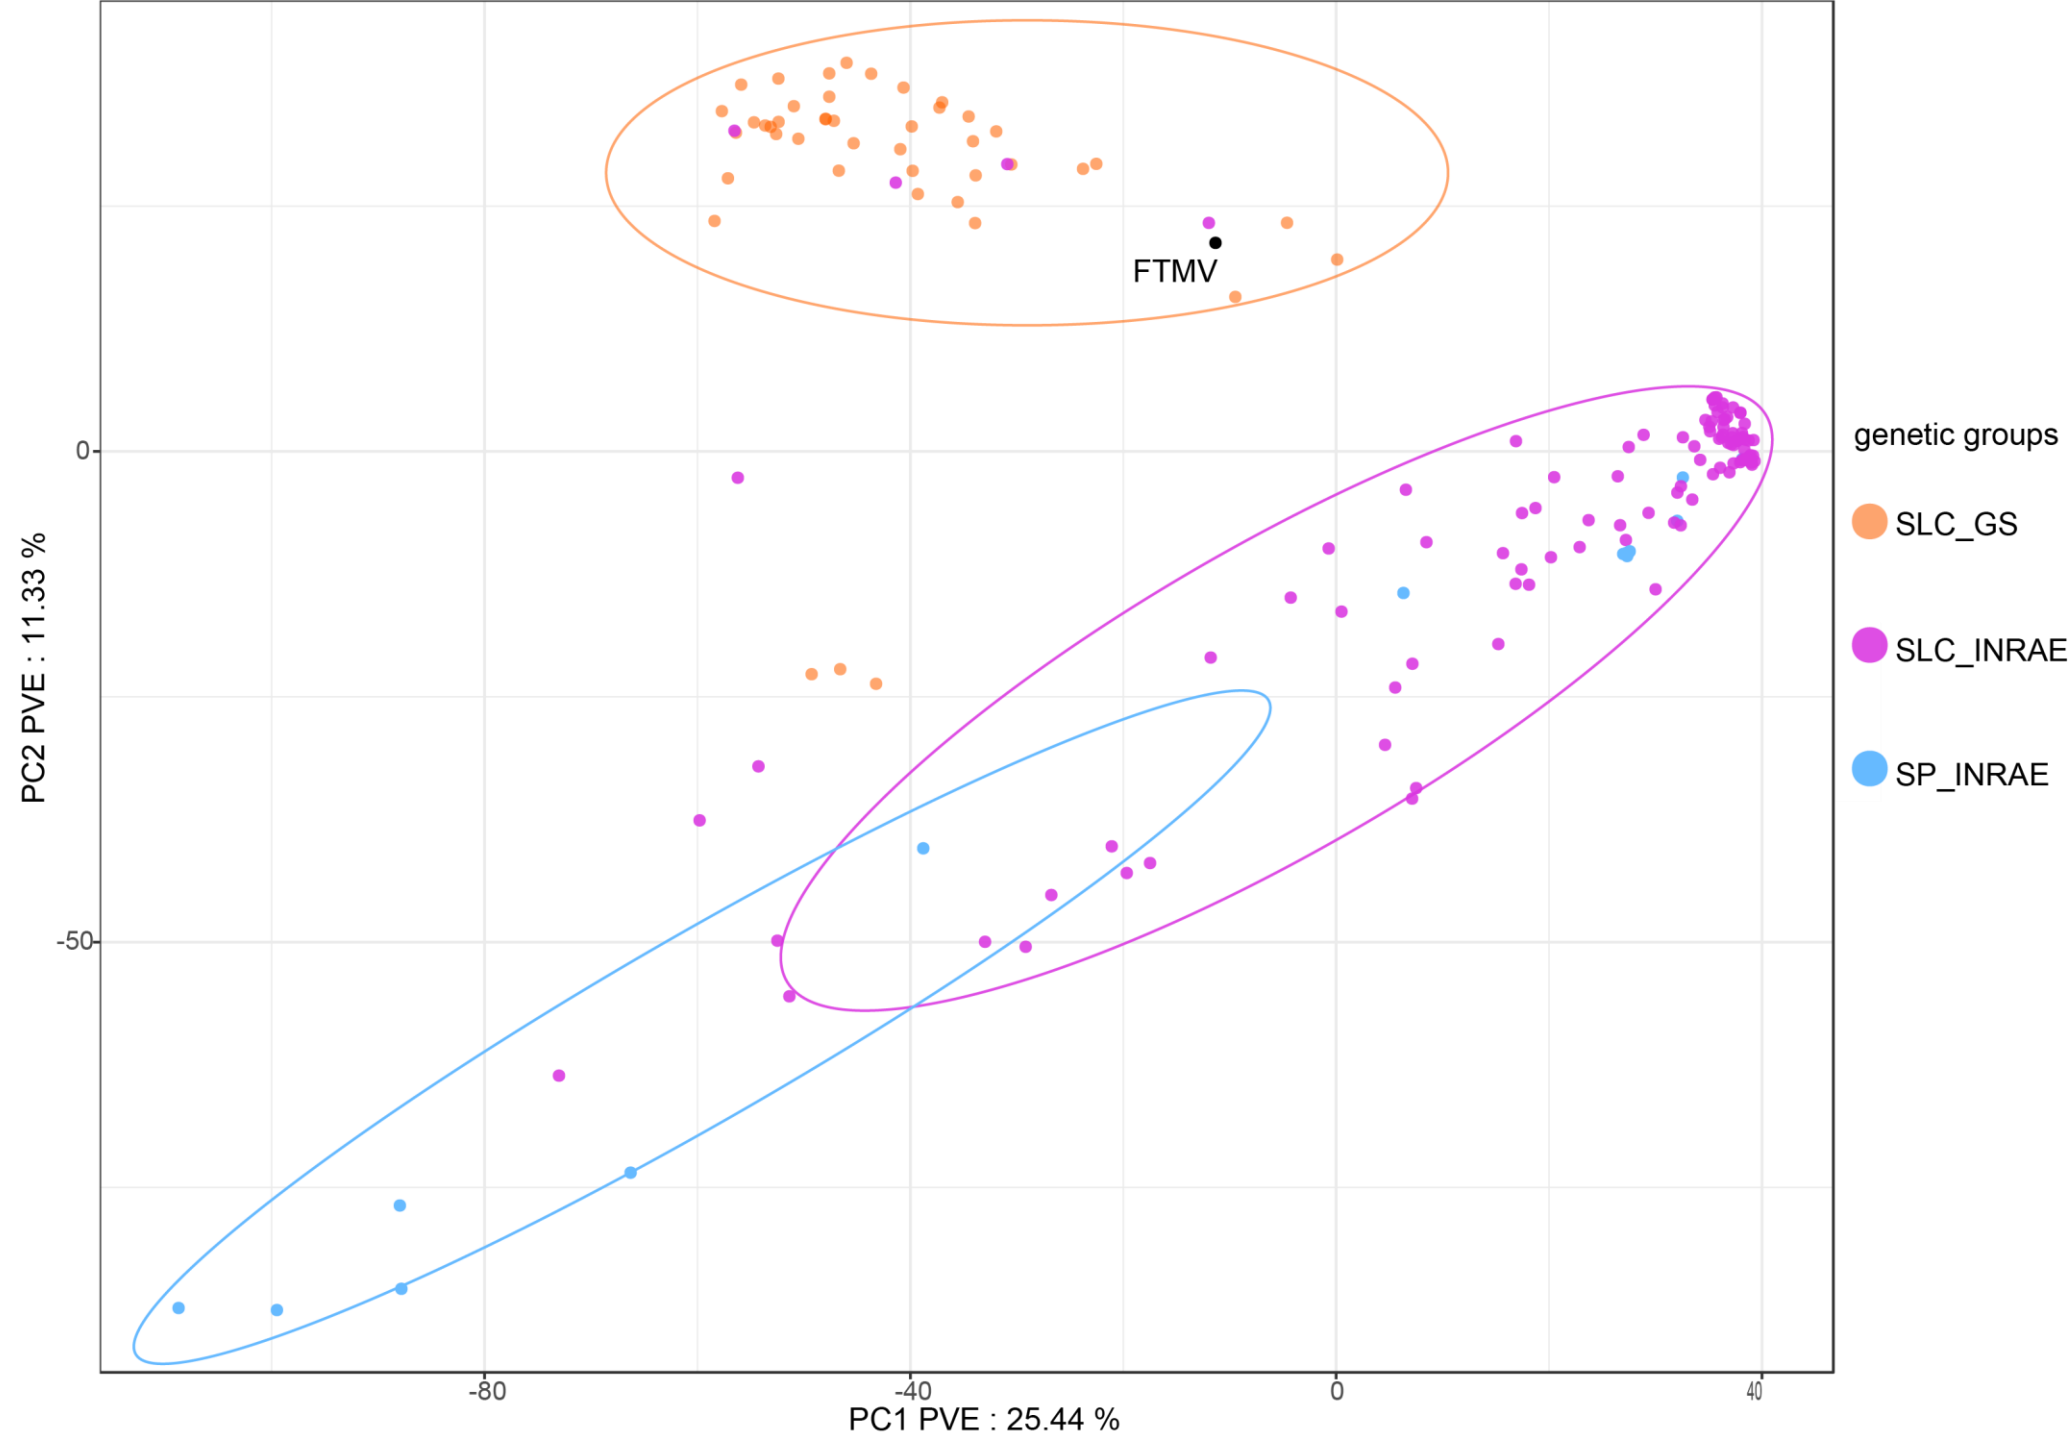

Samples

Metabolites

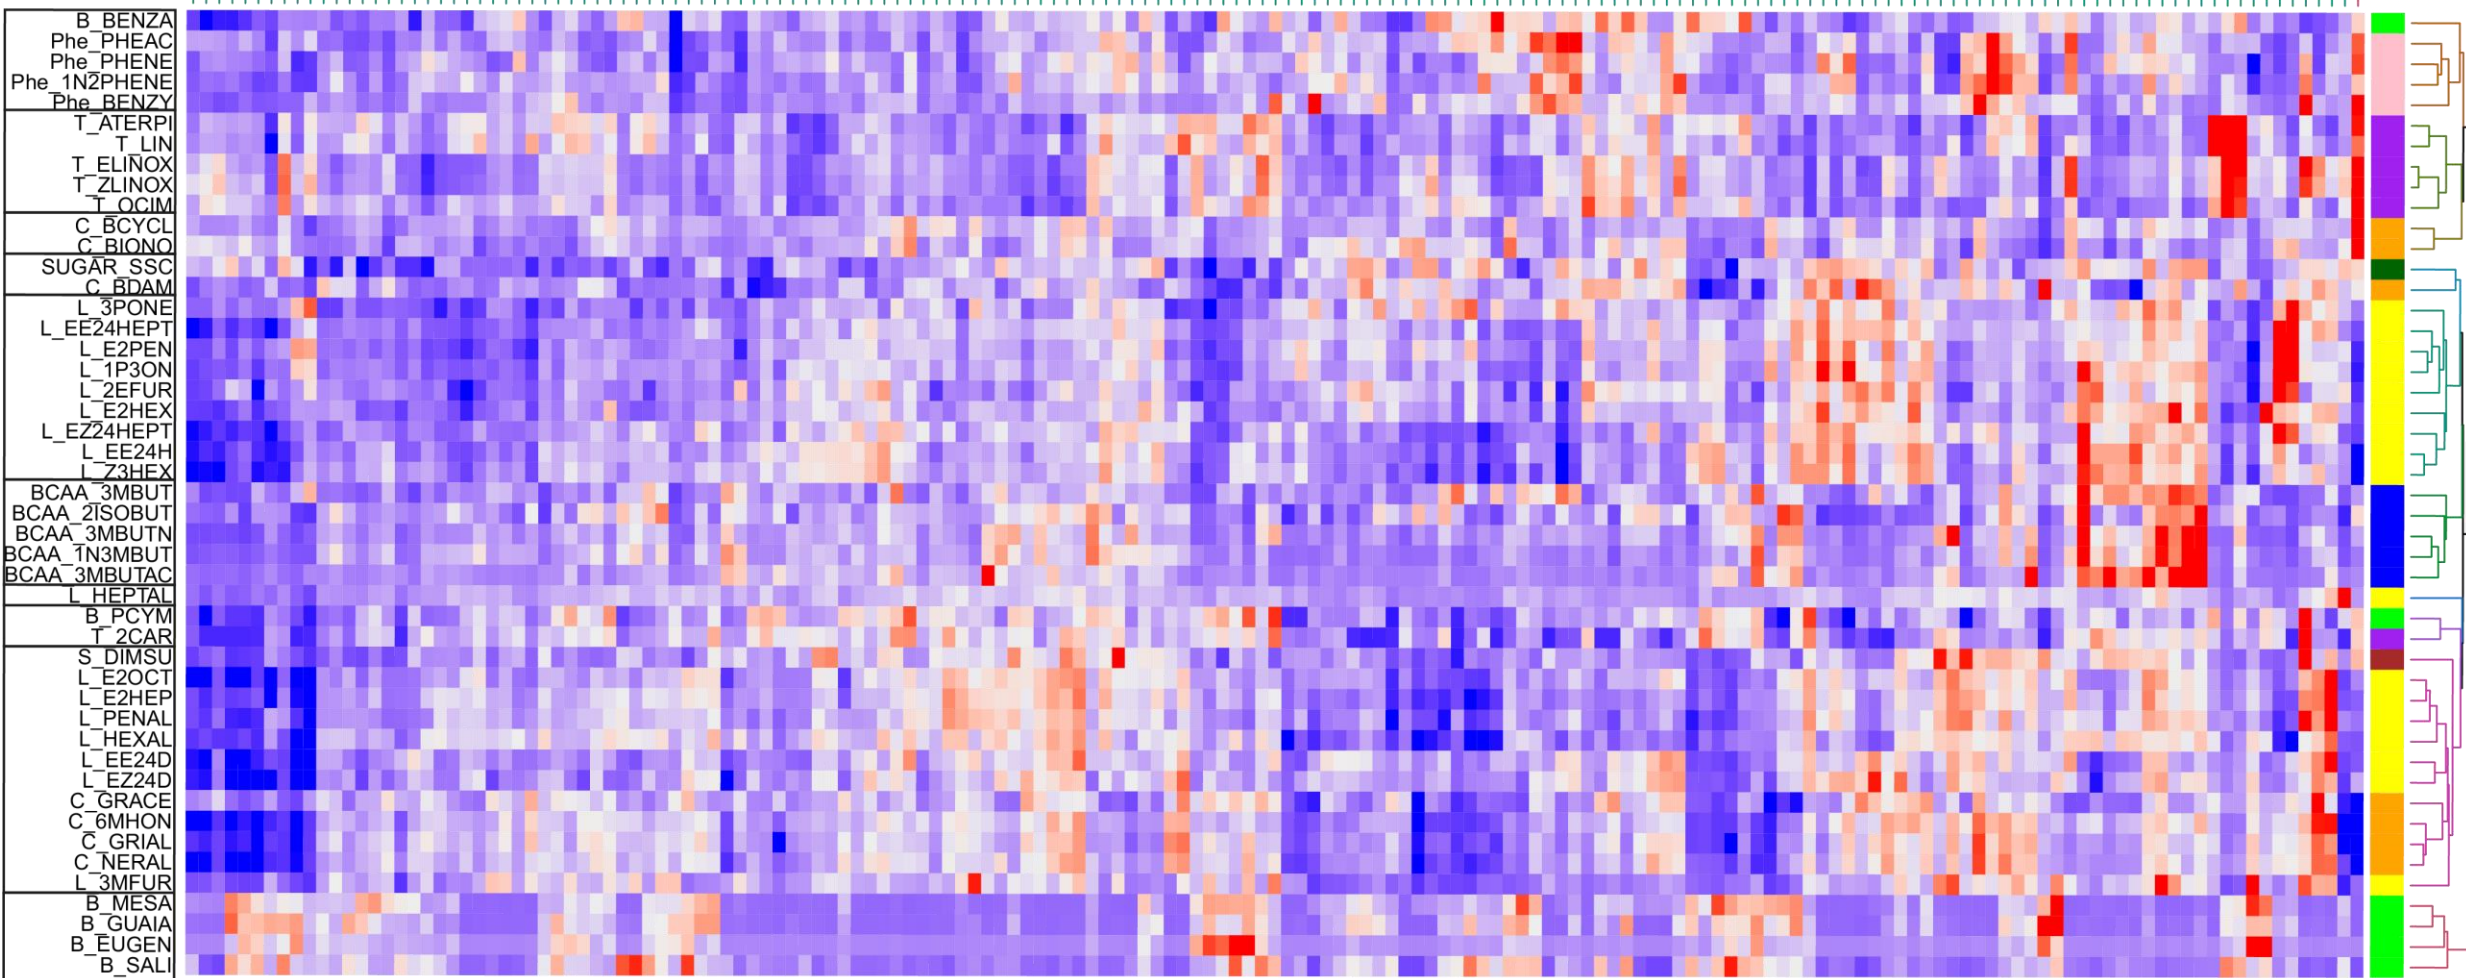

genetic groups

- SLC\_GS
- SLC\_INRAE
- SP\_INRAE

value

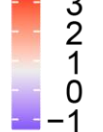

met.path

- L
- BCAA
- C
- Phe
- B
- S
- SUGAR

Height

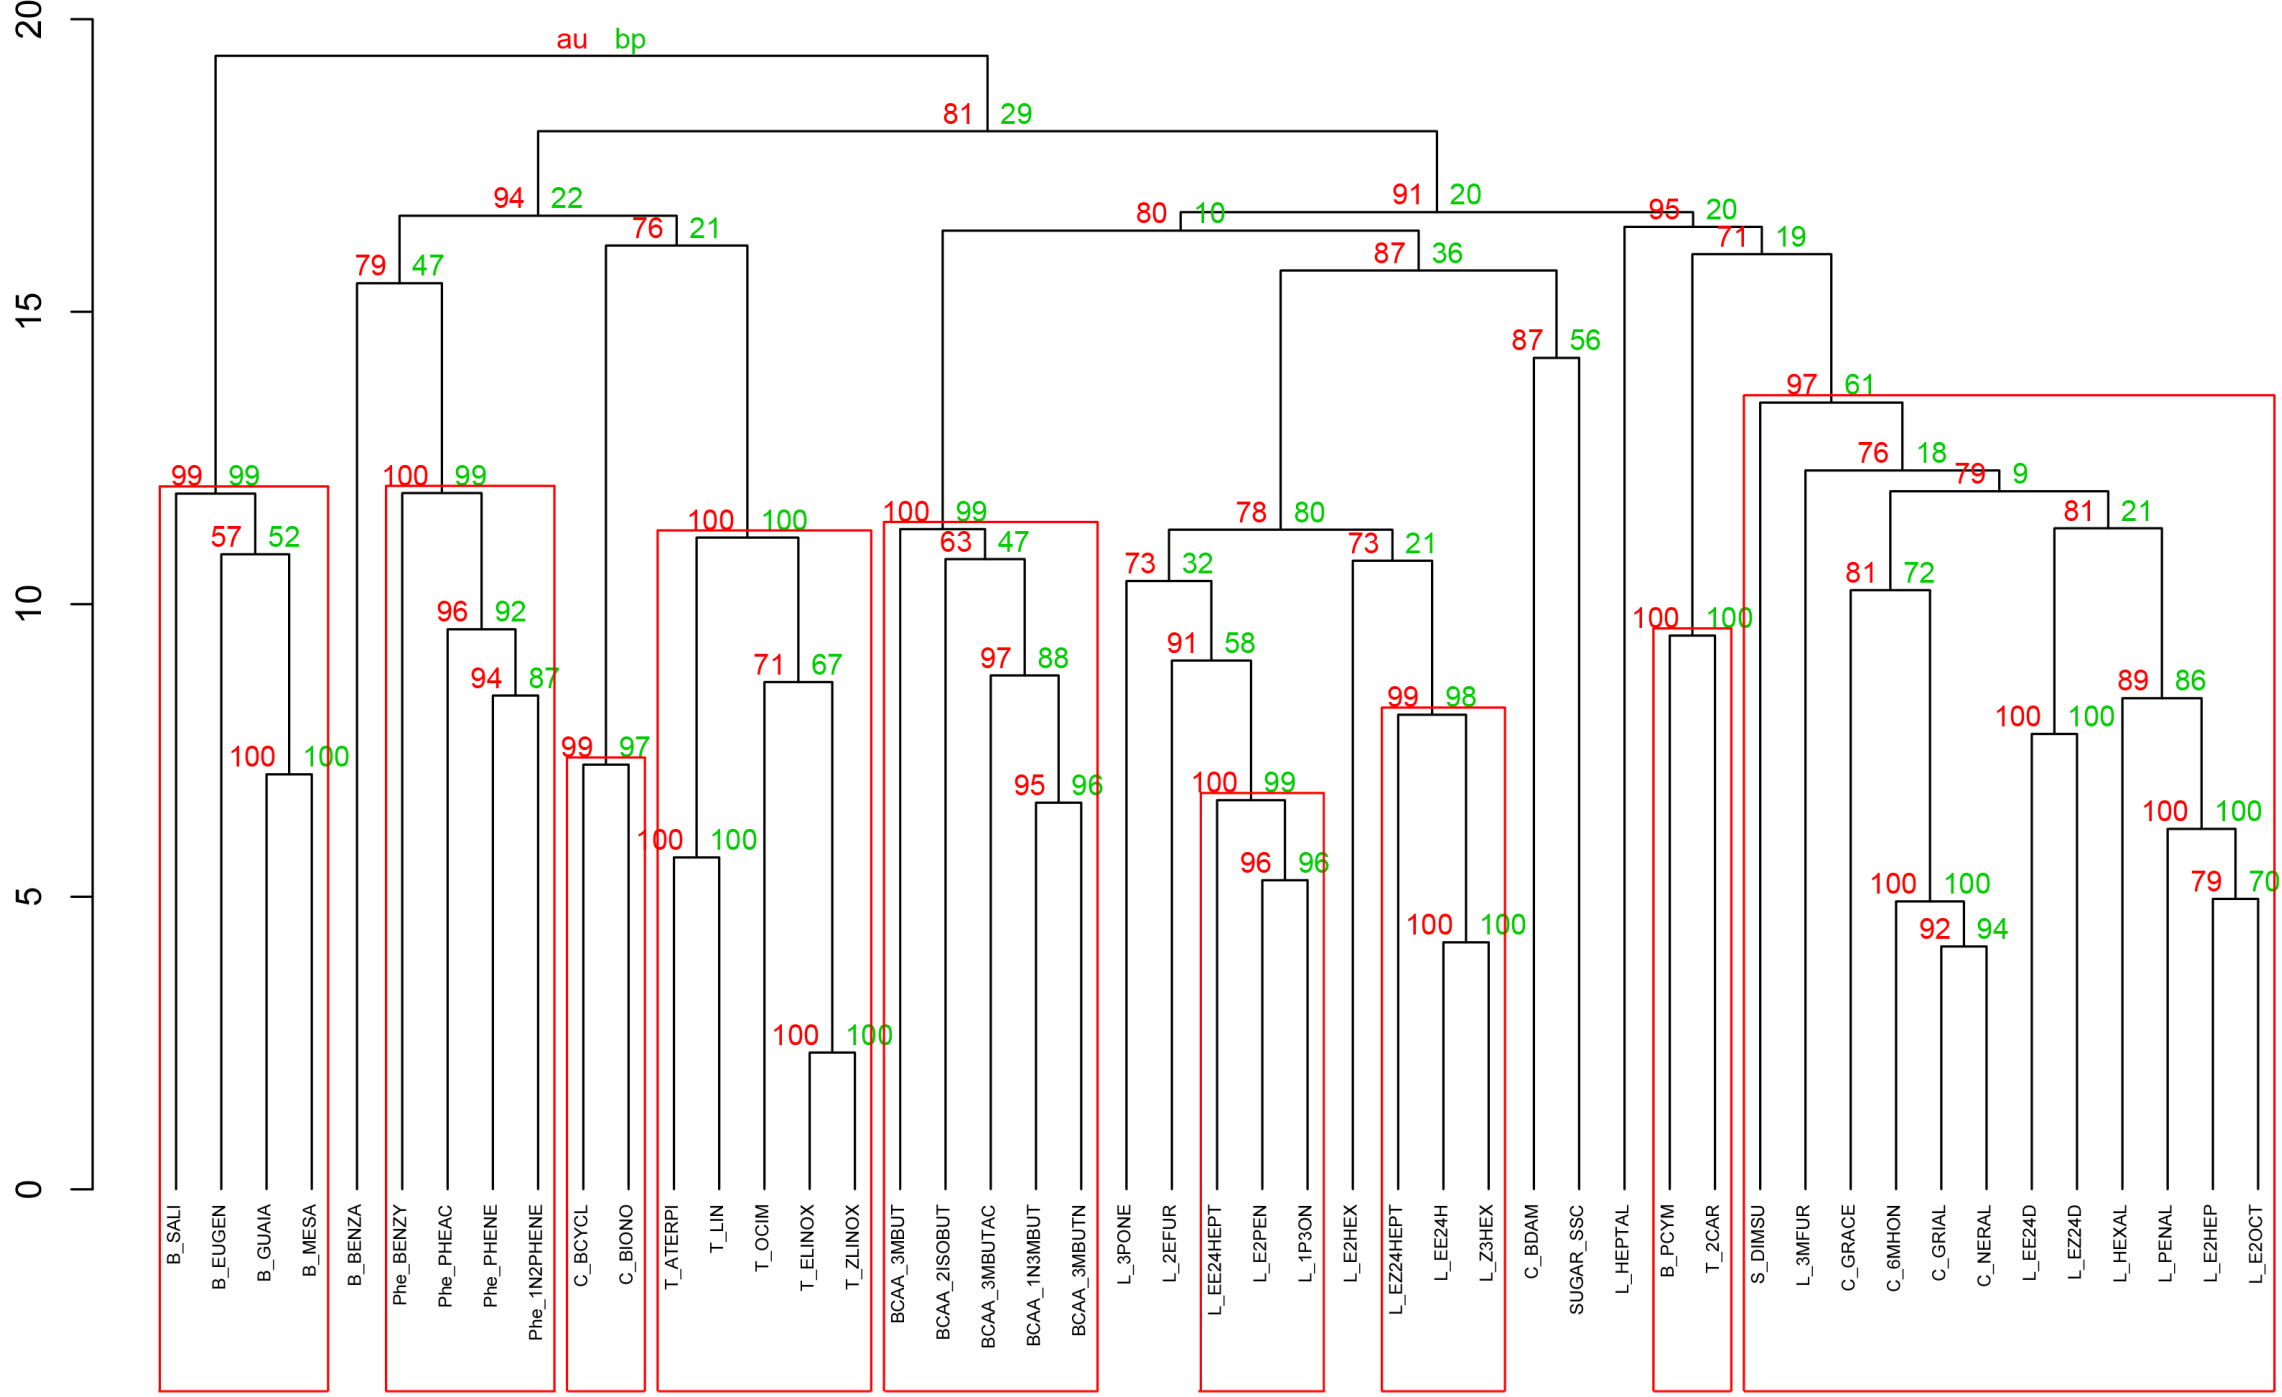

a)

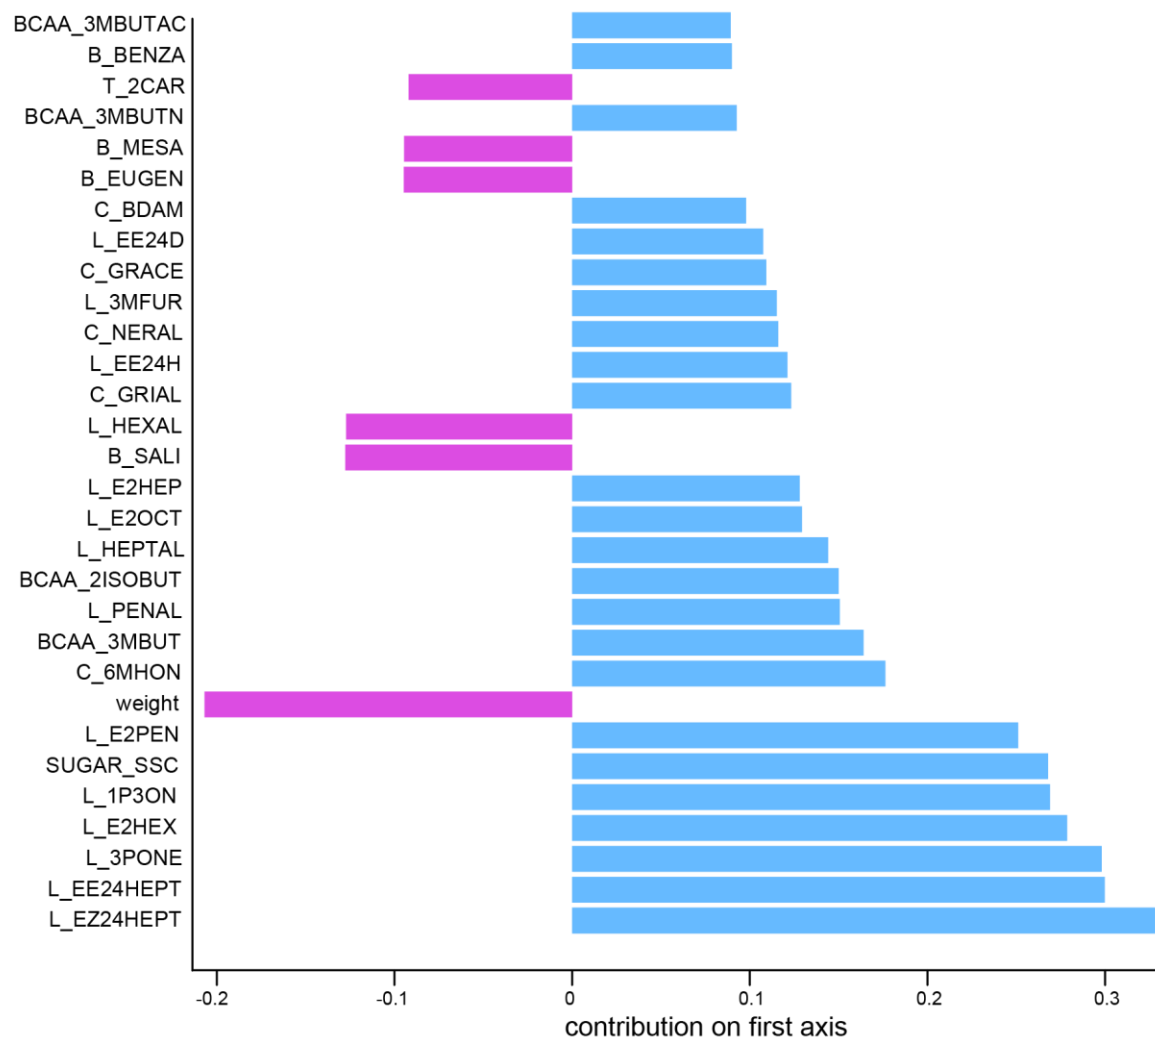

b)

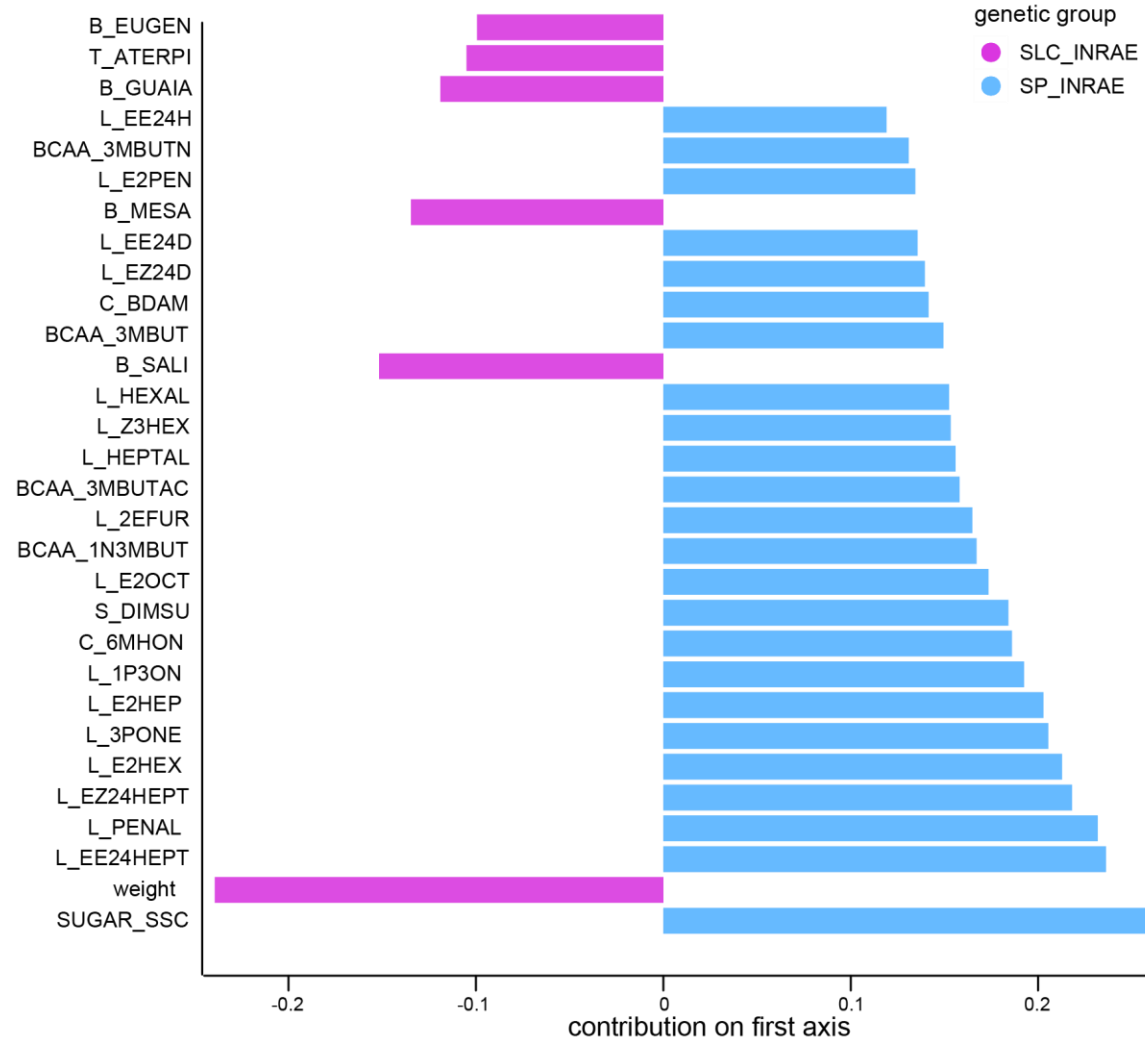

Supplement: s1 [file s1]
